# Supplementary material
Source: MDPI journal article supplement (https://www.mdpi.com/2071-1050/12/20/8345)
Supplement: s1 [file s1]

Students have reported many reasons behind their use of mobile phones during lecture periods. Kindly indicate how often you use your mobile phone during lecture periods based on the following reasons.

|                                                                                                                                                   |
|---------------------------------------------------------------------------------------------------------------------------------------------------|
| 1. To pass the time during the boring activities in the class.                                                                                    |
| 2. Don't involve in class discussions when it isn't exciting.                                                                                     |
| 3. Don't be adopted to the specific subject or teaching method of the instructor                                                                  |
| 4. Uninterested in a particular topic.                                                                                                            |
| 5. Lack of interest with the presenting lecturer.                                                                                                 |
| 6. Lack of interest regarding Unrelated questions which are proposed by the classmates.                                                           |
| 7. Feel a sense of frustrating or severe fatigue.                                                                                                 |
| 8. Keep in touch with close friends and members of the family                                                                                     |
| 9. Searching for the profile's change of my friend on social networking sites                                                                     |
| 10. Entertainment.                                                                                                                                |
| 11. To flirt (to behave towards someone in a way )                                                                                                |
| 12. Instant Messaging with friends and family.                                                                                                    |
| 13. Aware others from my current situation                                                                                                        |
| 14. To take notes                                                                                                                                 |
| 15. To achieve the notes and slides of lecturer class                                                                                             |
| 16. To obtain necessary materials about class subjects                                                                                            |
| 17. Utilize statistical applications (e.g., calculator)                                                                                           |
| 18. To Search for the unknown and misunderstanding phrases during the lecturer's teaching.                                                        |
| 19. To transfer the assignments to the absent students                                                                                            |
| 20. To record classwork slides or audio-video from the lecture notes                                                                              |
| 21. To look for undetermined vocabularies and new unknown concepts during the lecture hours                                                       |
| 22. To have a softcopy of necessary descriptions on the board                                                                                     |
| 23. Urgent need of calling in required circumstances.                                                                                             |
| 24. To consult with a member of the family or friend in some urgent occasions.                                                                    |
| 25. To provide or get receive an urgent call                                                                                                      |
| 26. To tell somebody for doing an urgent activity due to the lack of time                                                                         |
| 27. To send or receive an urgent call or message                                                                                                  |
| 28. To assist someone's in urgent situations to make a call or send required information as a message.                                            |
| 29. Could not be able to reduce someone's behavioral control in the using of Social Networking Sites like Instagram                               |
| 30. Addiction to use mobile phones                                                                                                                |
| 31. To Enforce to respond to the new messages or read them.                                                                                       |
| 32. To feel unsatisfied or stressed in the absence of my phone.                                                                                   |
| 33. Responsible for responding to the income calls from others.                                                                                   |
| 34. To cope with my mental stress                                                                                                                 |
| 35. Simultaneous utilization of mobile phones within listening to the lecturer in the class.                                                      |
| 36. When I'm in a bored class, uses of social networking sites does not distract my focus from the classwork                                      |
| 37. Playing video or online games on my phone does not impact affect my concentration, especially when I feel a sense of boredom during the class |
| 38. For business-related purposes /issues/                                                                                                        |
